# Supplementary material
Source: ML conference proceedings conference paper supplement (https://aclanthology.org/2026.semeval-1.30)

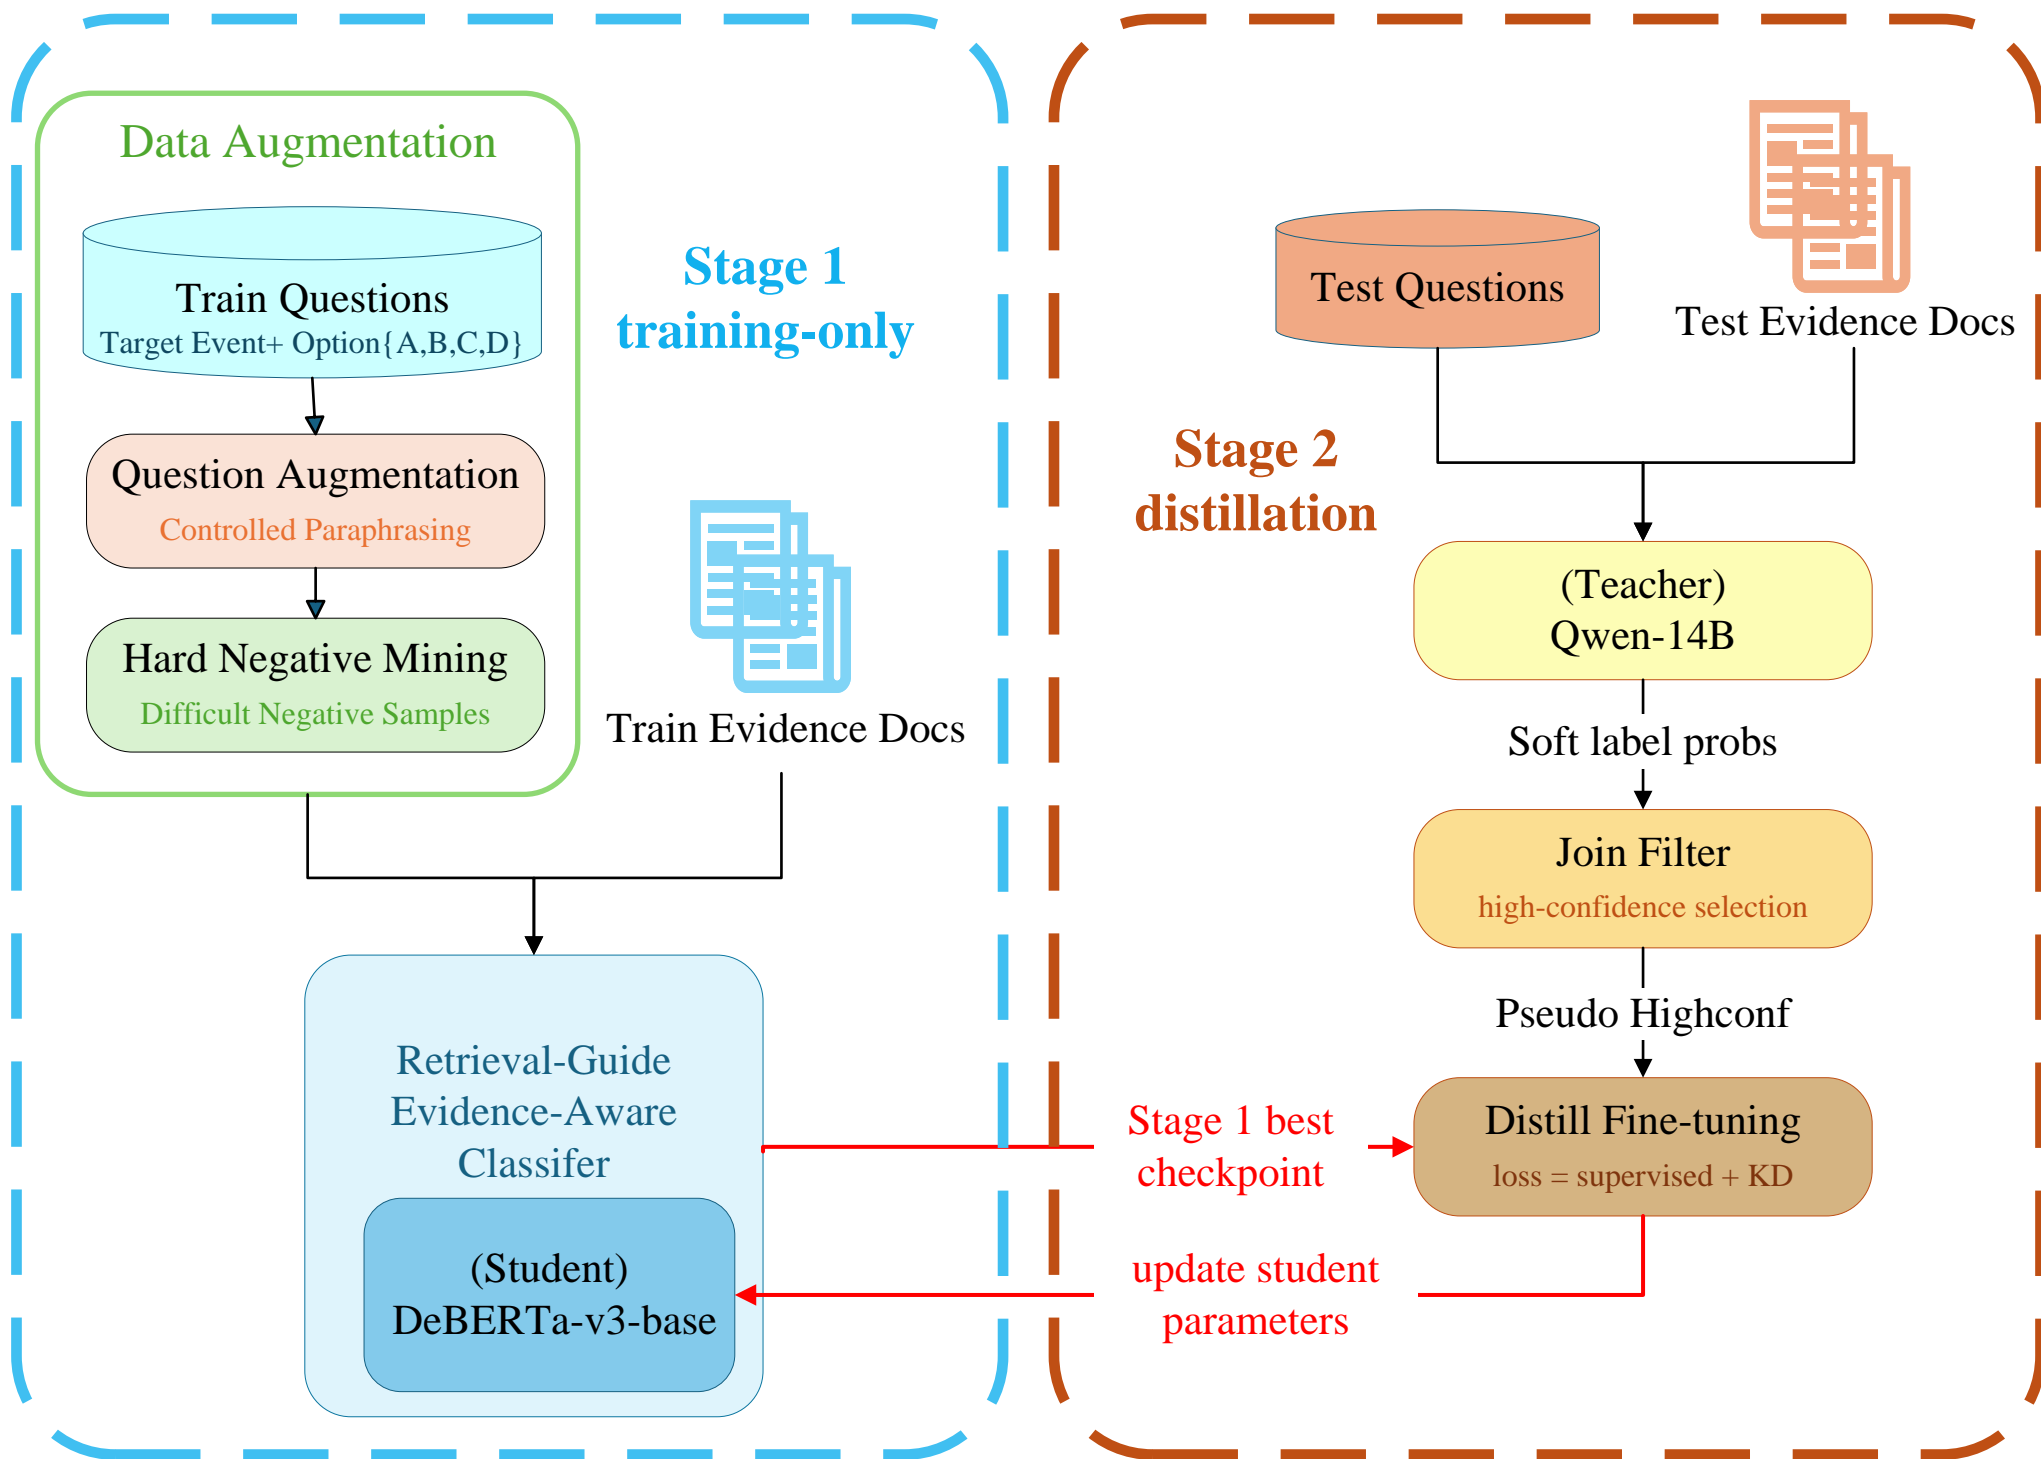

Supplement: SupplementaryMaterial [file fig1.pdf › fig1.pdf]

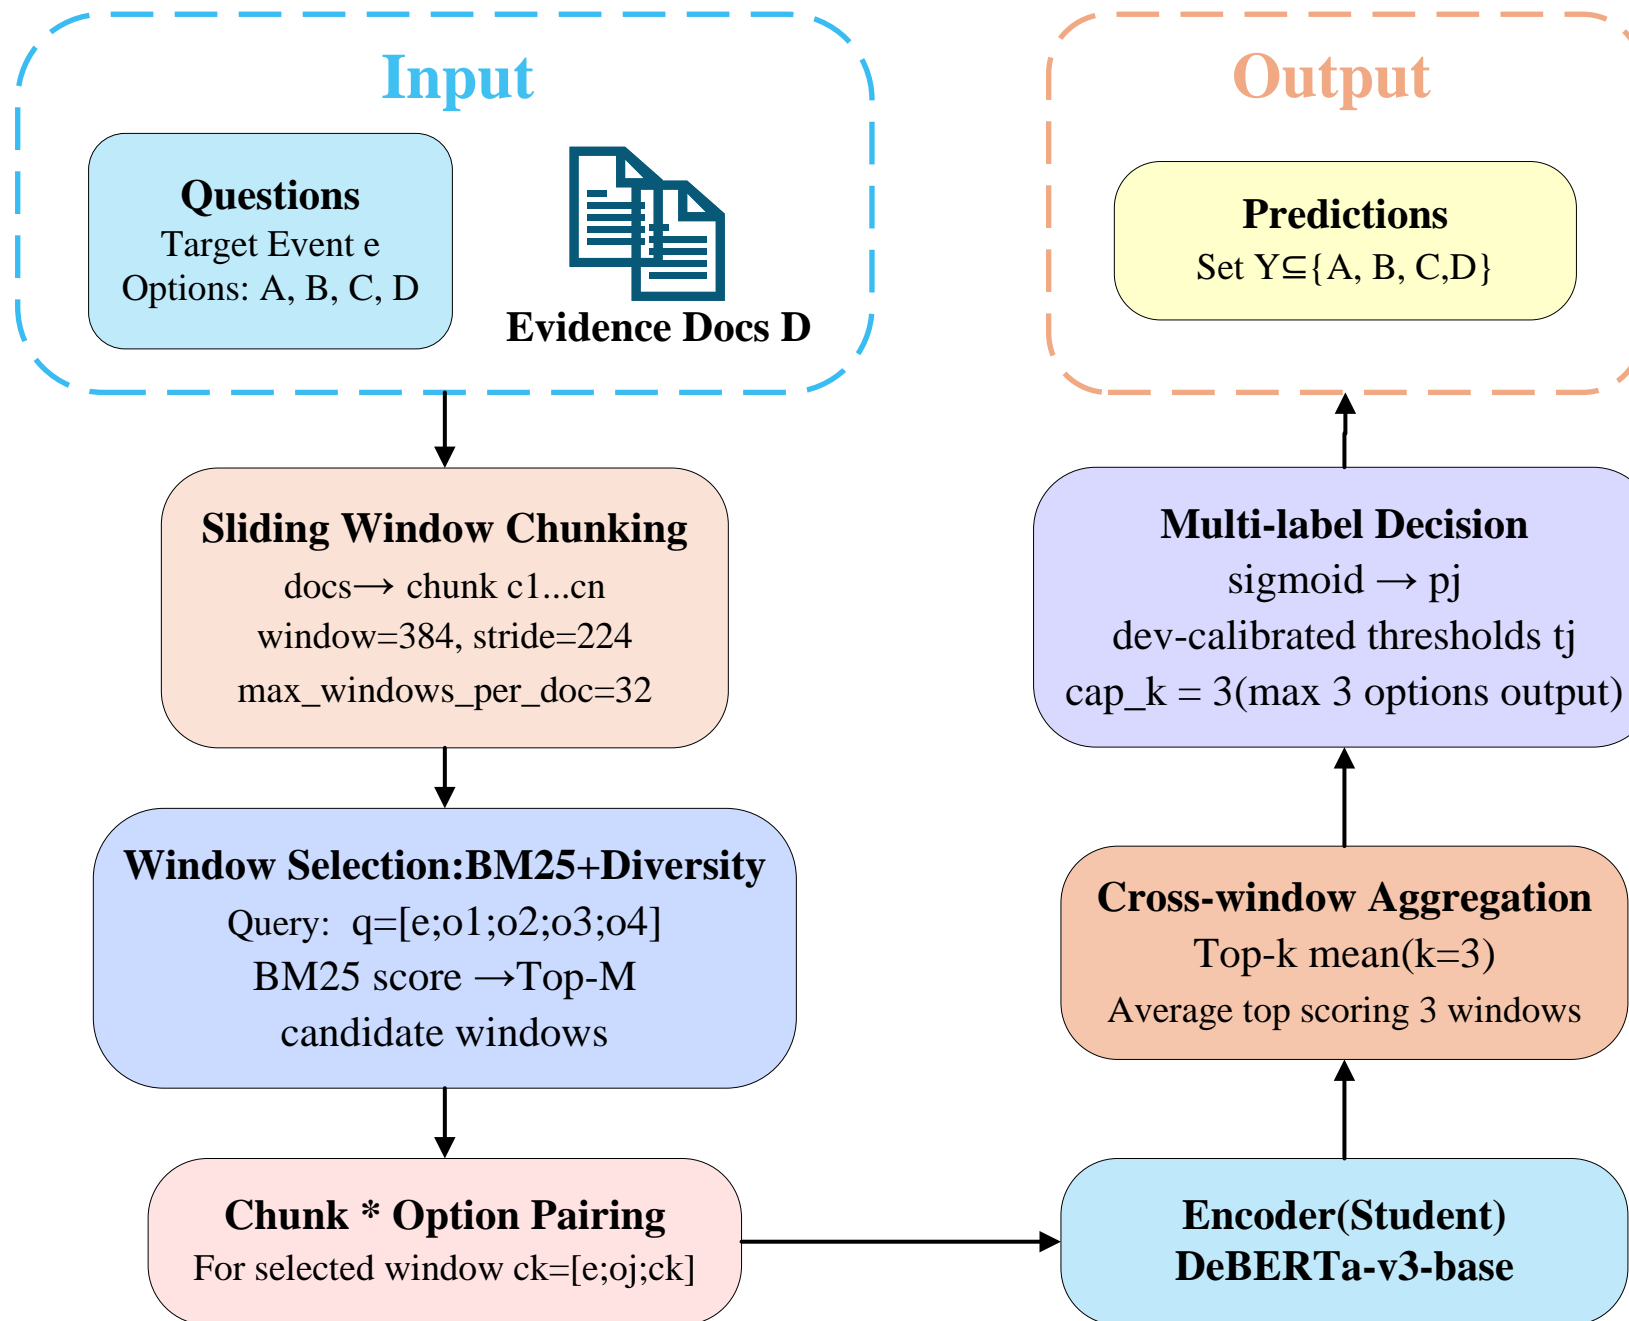

Supplement: SupplementaryMaterial [file fig2.pdf › fig2.pdf]
